# Supplementary material for: An optimized mild reduction route towards excellent cobalt–graphene catalysts for water oxidation
Source: Royal Society of Chemistry journal article supplement (doi:10.1039/c5ra09956k), 2015-01-01
Supplement: c5ra09956k1.pdf [file c5ra09956k1.pdf]

## Supplementary Information

### An optimized mild reduction route towards excellent cobalt-graphene catalysts for water oxidation

D. Pihusut,<sup>a†</sup> J. D. Ocon,<sup>ac†</sup> Jae Kwang Lee<sup>ab</sup> and J. Lee<sup>\*ab</sup>

<sup>a</sup> Electrochemical Reaction and Technology Laboratory (ERTL), School of Environmental Science and Technology, <sup>b</sup> Ertl Center for Electrochemistry and Catalysis, RISE, Gwangju Institute of Science and Technology (GIST), Gwangju 500-712, South Korea

<sup>c</sup> Laboratory of Electrochemical Engineering (LEE), Department of Chemical Engineering, College of Engineering, University of the Philippines Diliman, Quezon City 1101, Philippines.

† These authors contributed equally to this work.

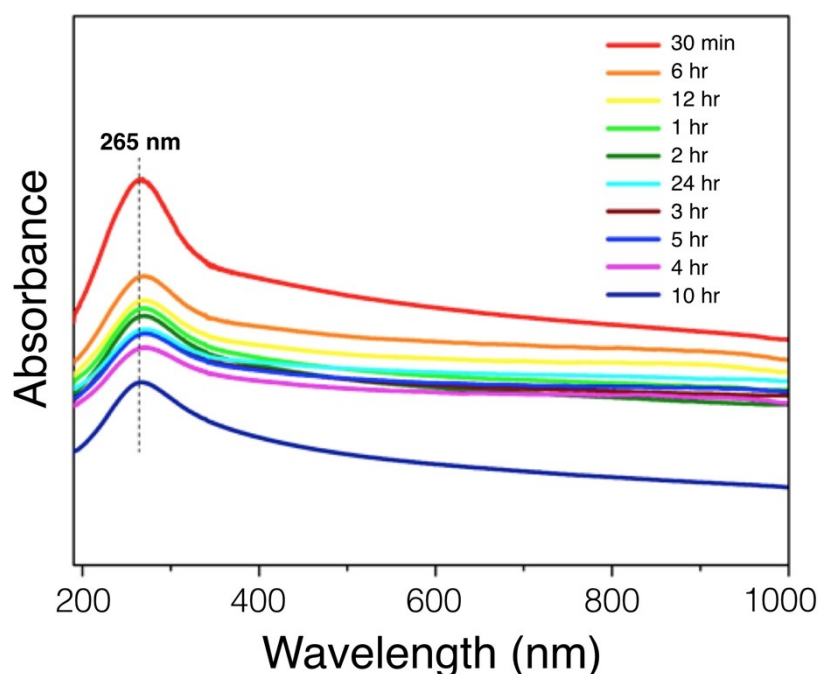

**Fig. S1.** UV-Vis absorption spectra of gRGOs reduced at 90 °C with different reduction times.

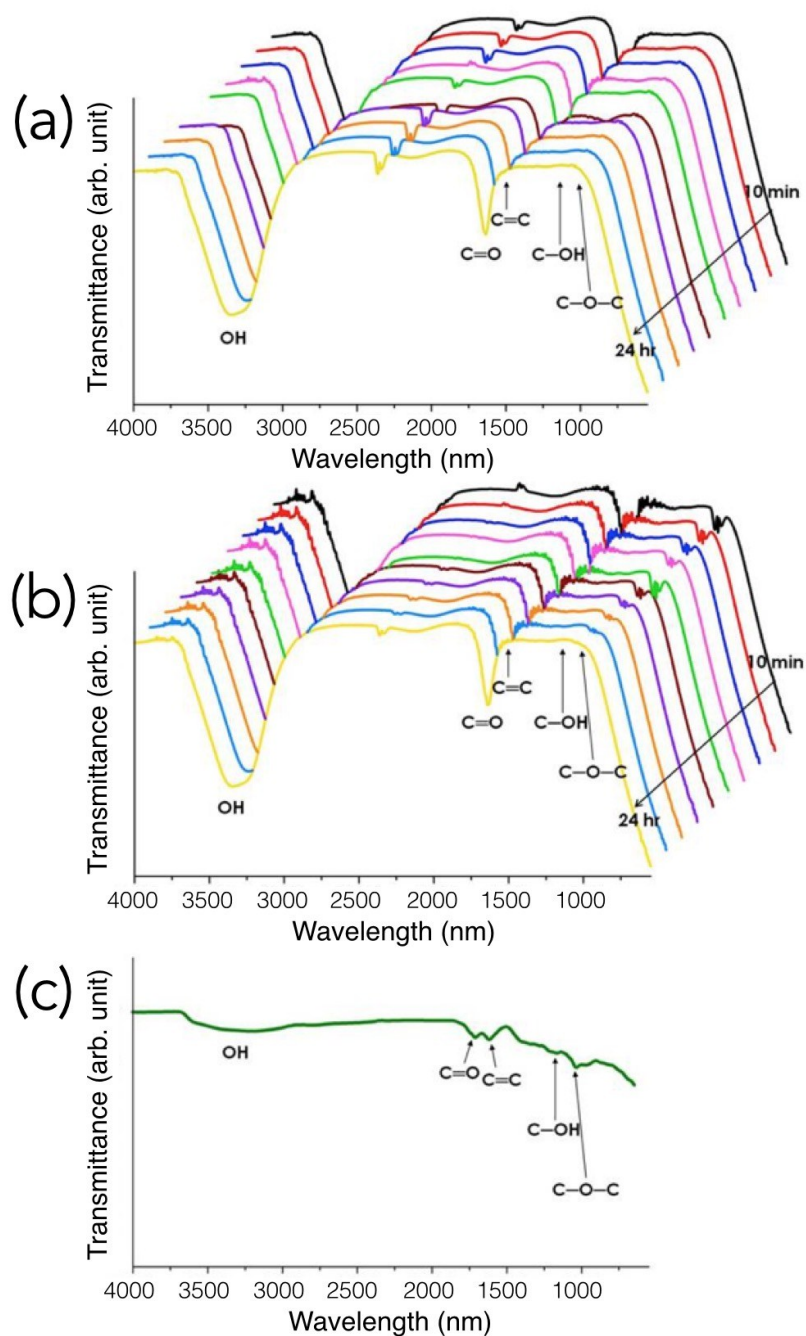

**Fig. S2.** FT-IR spectra of gRGOs reduced with different reduction times at (a) 25 °C and (b) 90 °C and (c) pristine graphene oxide (GO).

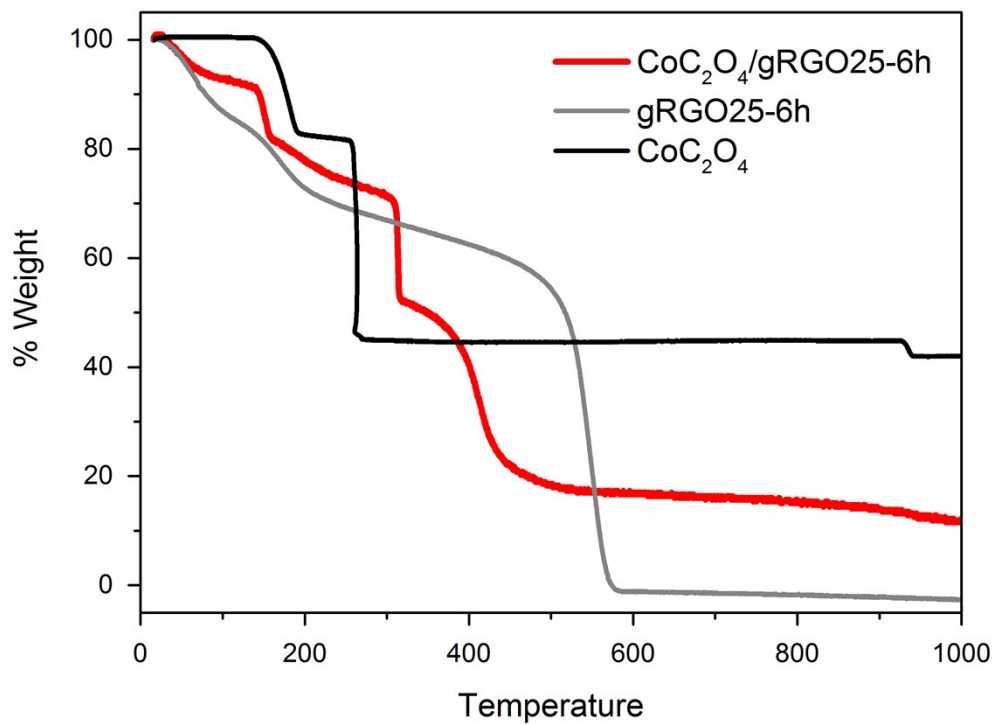

**Fig. S3.** Residual mass loss curves of the  $\text{CoC}_2\text{O}_4/\text{gRGO}$  electrocatalyst reduced at  $25^\circ\text{C}$  for 6 hr and its individual components.

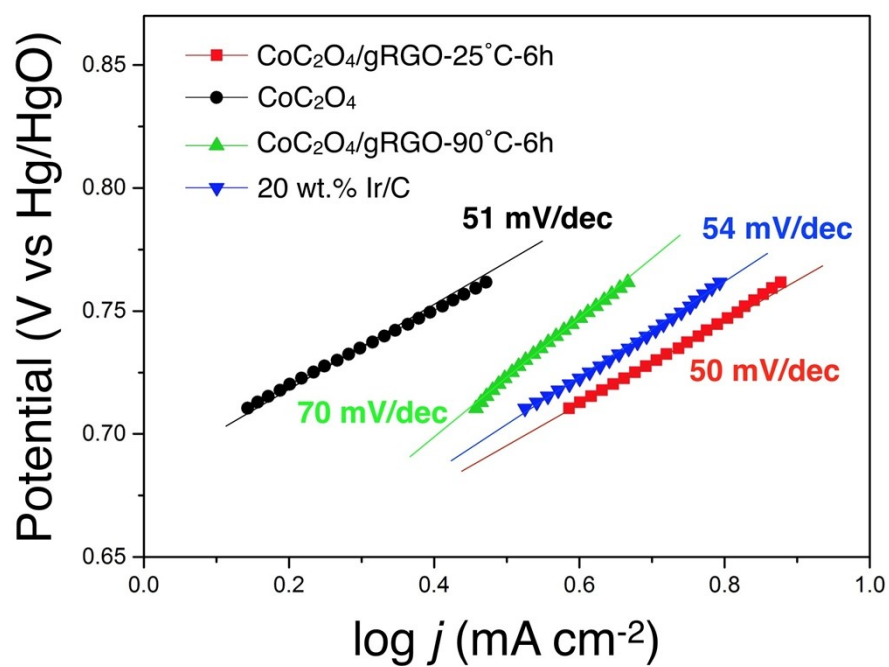

**Fig. S4.** Steady-state Tafel slope measurements of CoC<sub>2</sub>O<sub>4</sub>/gRGO-25°C-6h (red), 20 wt.% Ir/C (blue), CoC<sub>2</sub>O<sub>4</sub>/gRGO-90°C-6h (green), and CoC<sub>2</sub>O<sub>4</sub> (black).

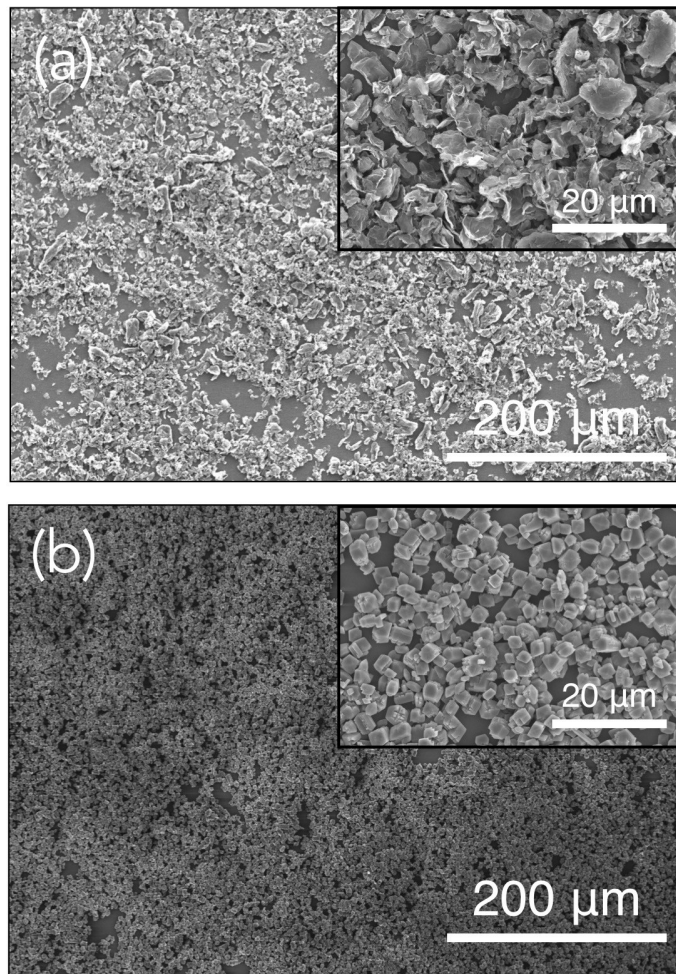

**Fig. S5.** SEM images of (a) CoC<sub>2</sub>O<sub>4</sub>/gRGO reduced at 90°C for 6 hr and (b) CoC<sub>2</sub>O<sub>4</sub> structures formed at 25 °C for 6 hr.
